# Supplementary material for: A new approach towards the synthesis of pseudaminic acid analogues
Source: Royal Society of Chemistry journal article supplement (doi:10.1039/c3ob42491j), 2014-01-01

## Supporting Information for

### **“A new approach towards the synthesis of pseudaminic acid analogues”**

Matthew Zunk, James Williams, James Carter, and Milton J. Kiefel\*

*Institute for Glycomics, Griffith University, Gold Coast, Australia*

#### General

All reagents and solvents were distilled prior to use and were purchased from Sigma unless otherwise stated. NMR spectra were recorded using a Bruker 300 MHz spectrometer operating at 300MHz and 75.5MHz for  $^1\text{H}$  and  $^{13}\text{C}$  NMR spectra, respectively, unless indicated otherwise. COSY and HSQC two-dimensional spectra were used to aid with assignments. Mass spectroscopy was performed using Bruker Esquire 3000 Ion trap electrospray ionisation Mass Spectrometer. Column chromatography (“flash”) was carried out using Merck Kieselgel 60 silica gel, and reactions were monitored using Merck Kieselgel 60 F<sub>254</sub> aluminium backed T.L.C. plates. Visualisation of T.L.C.’s involved dipping plates into a 5% H<sub>2</sub>SO<sub>4</sub> in EtOH solution, and then heating the plate at ~150°C.

Following are some NMR spectra of key compounds reported in the paper.

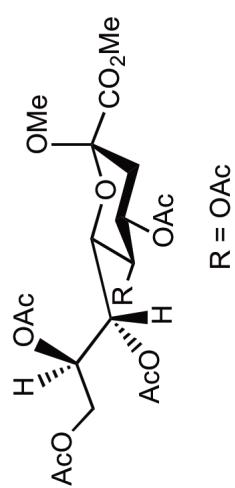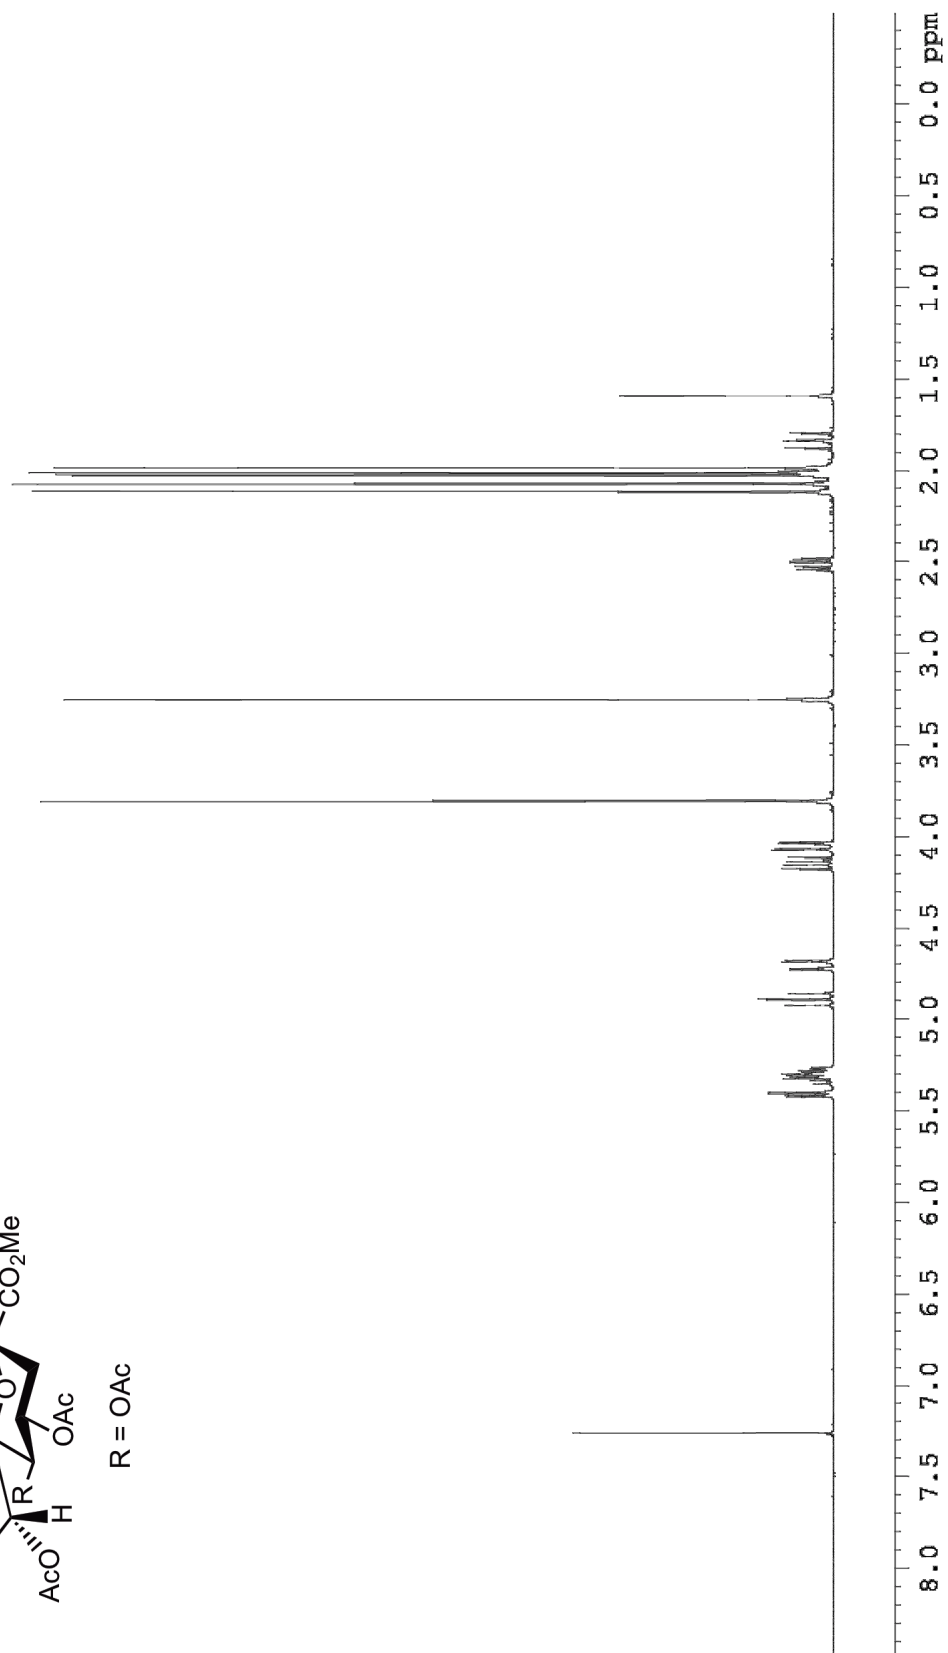

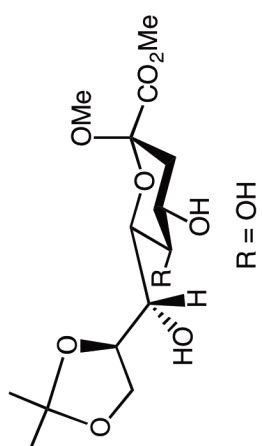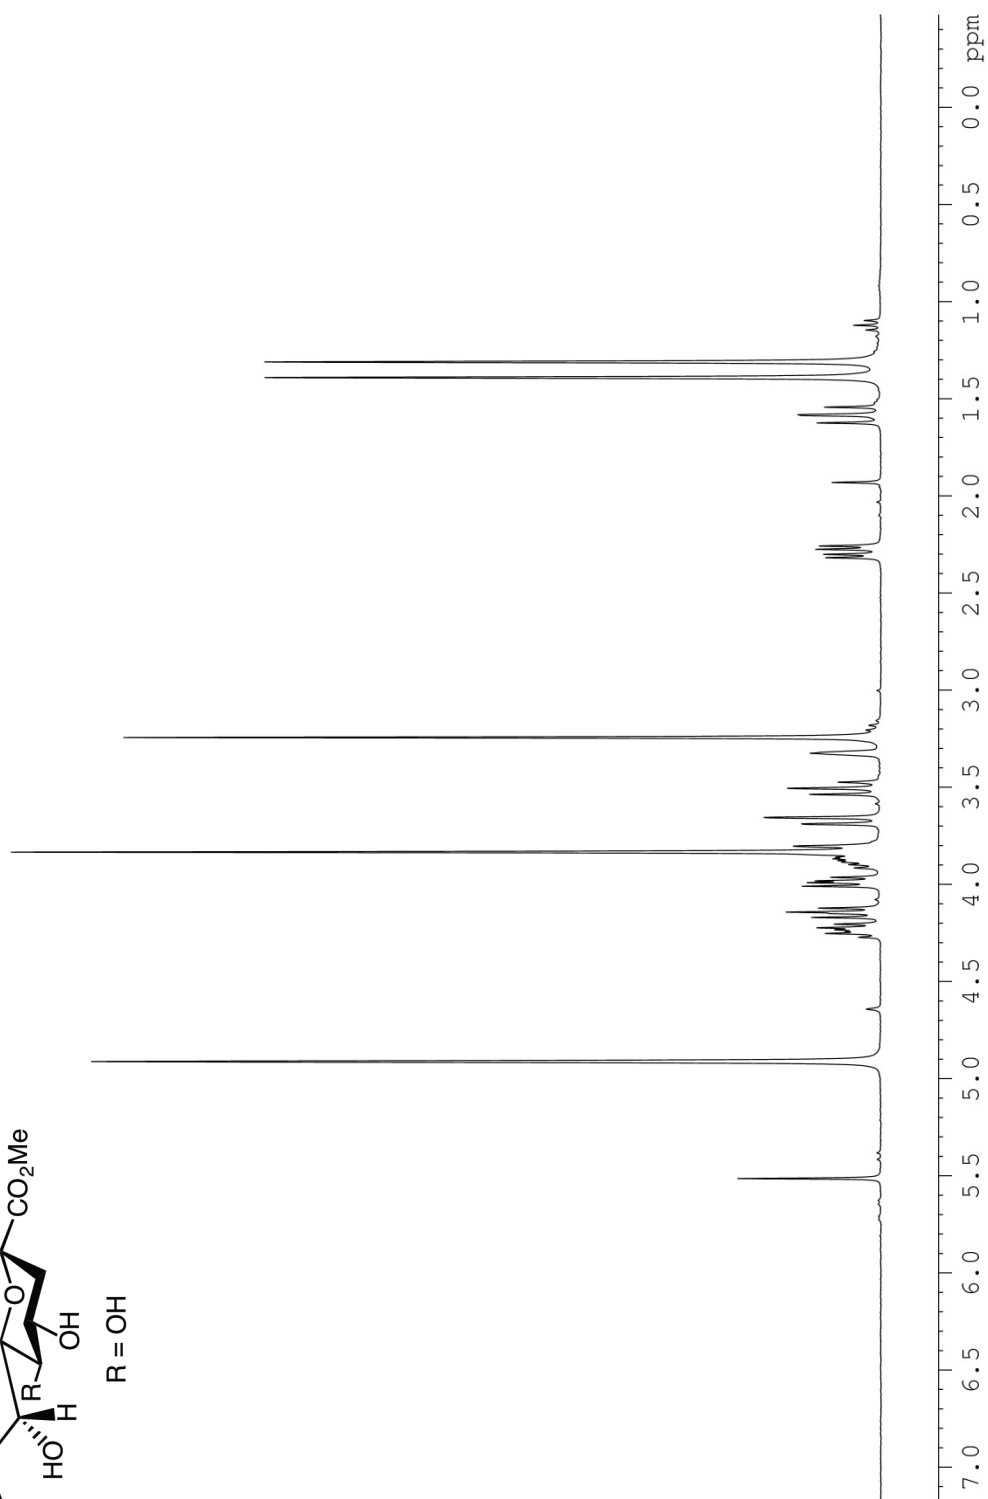

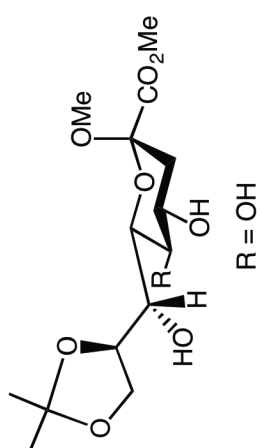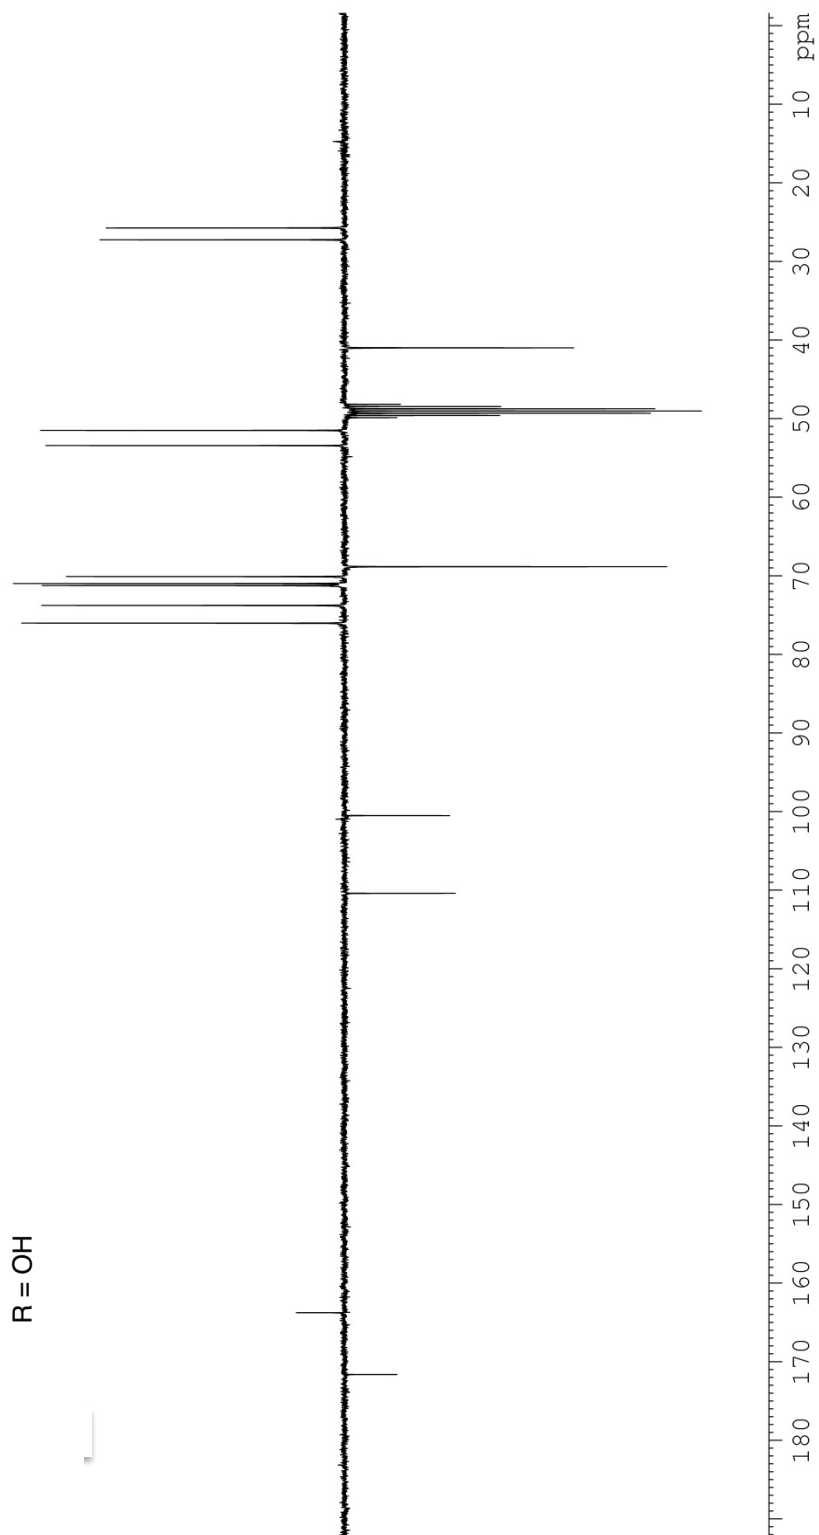

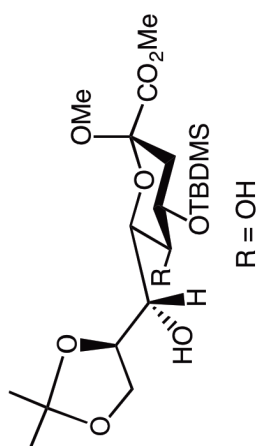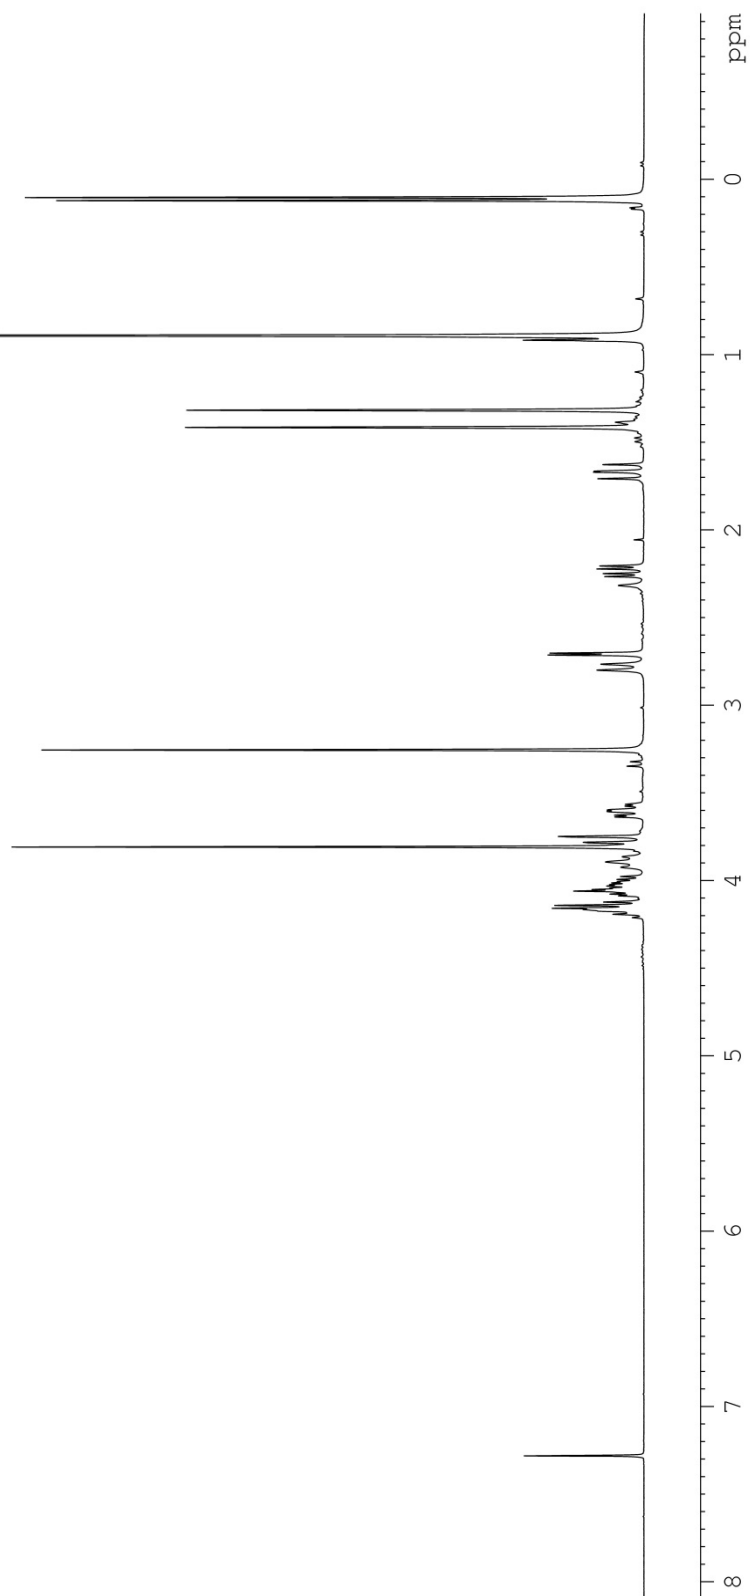

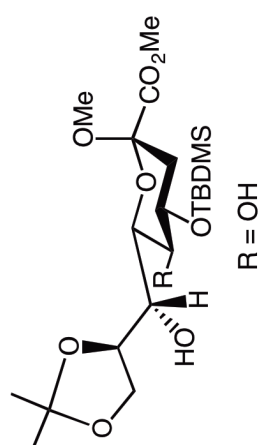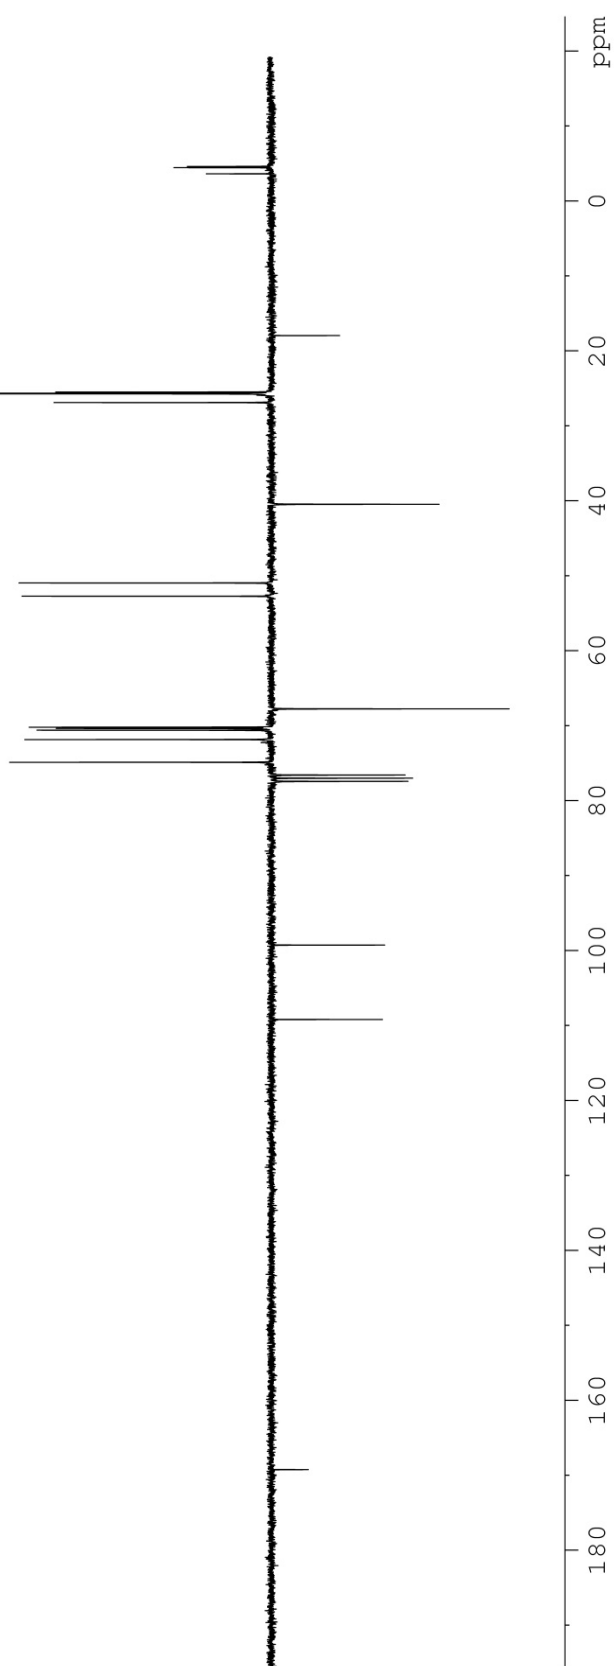

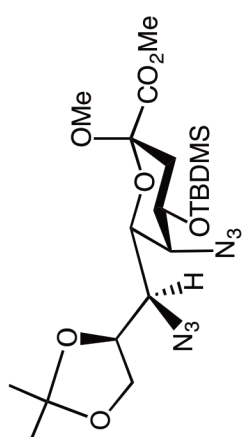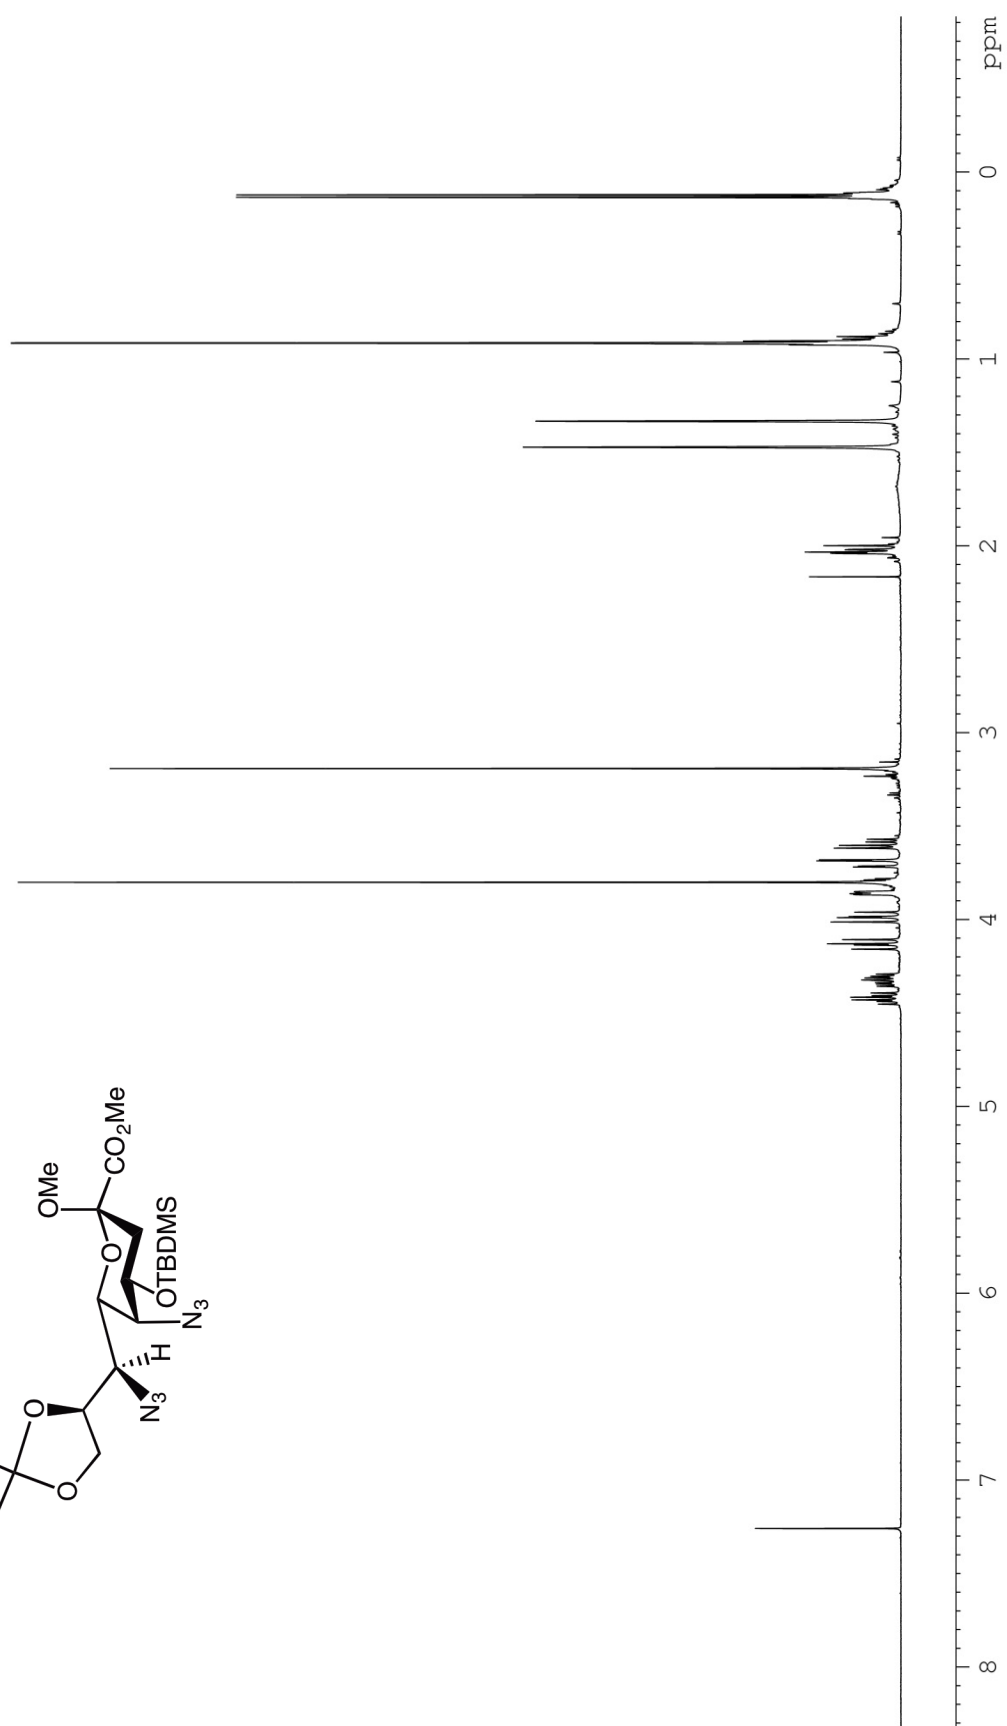

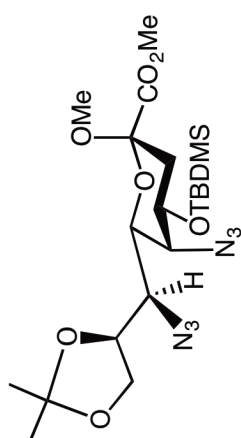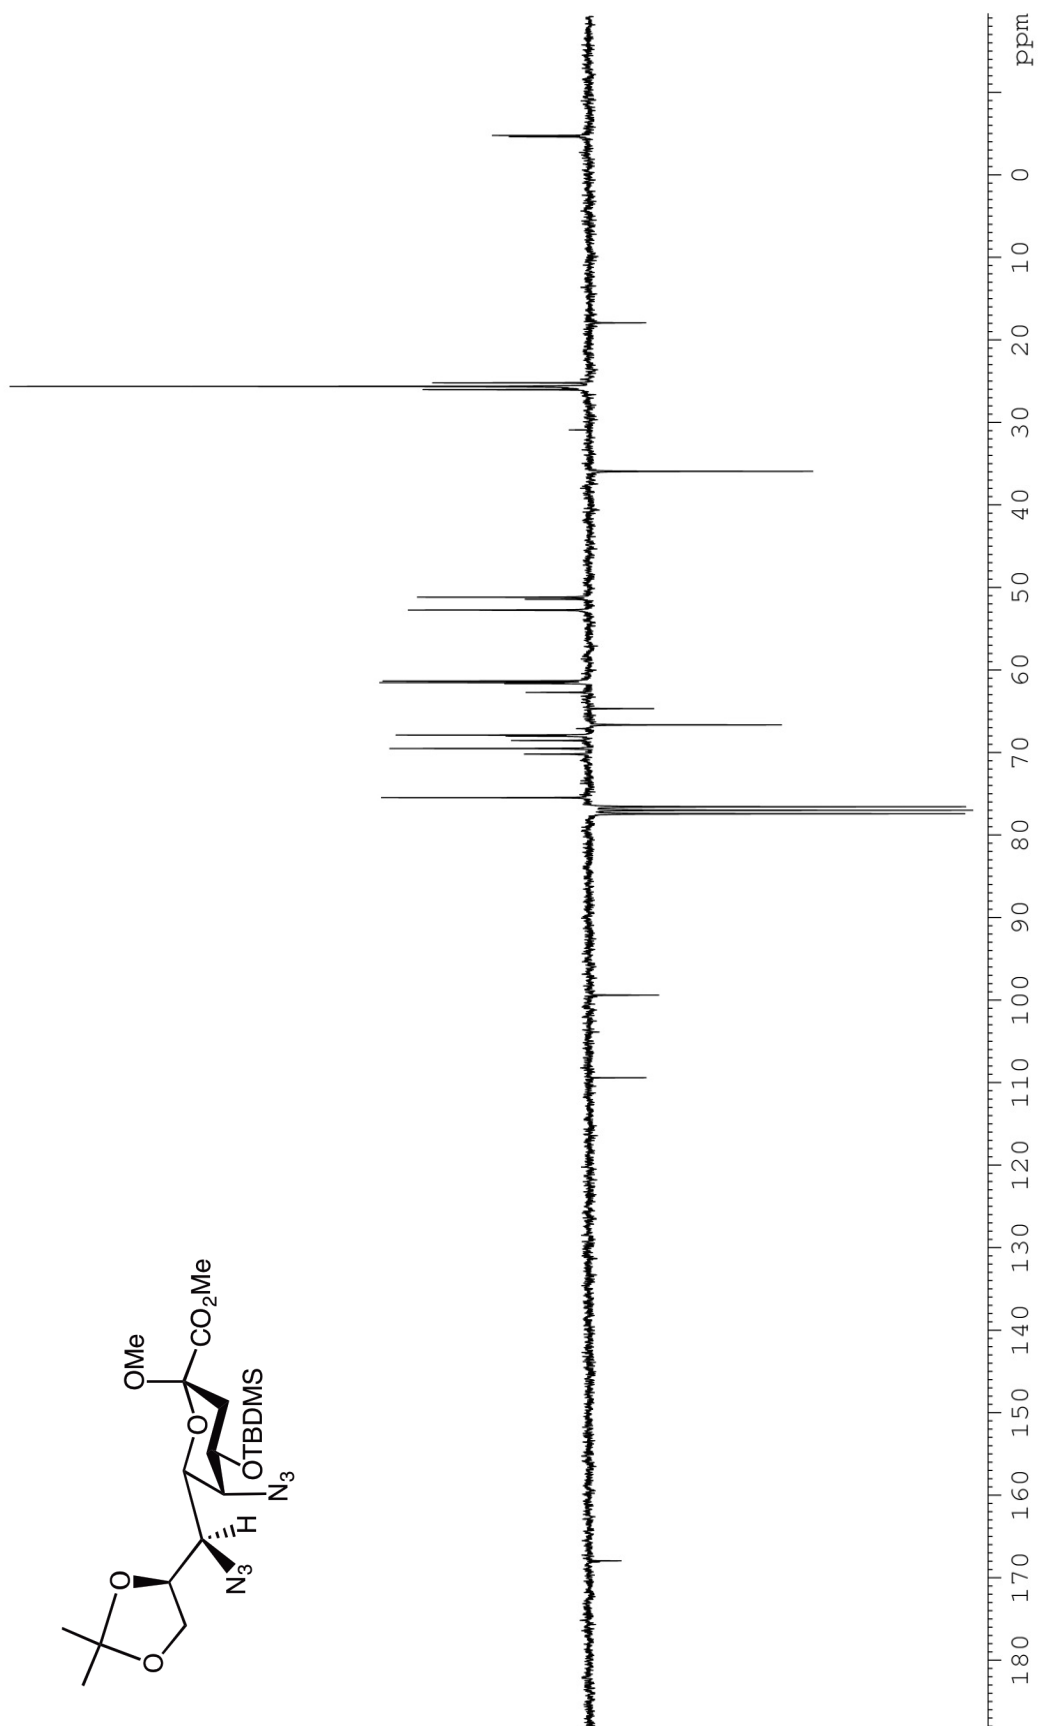



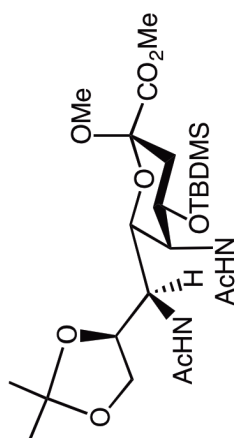

Spectrum recorded at 600MHz

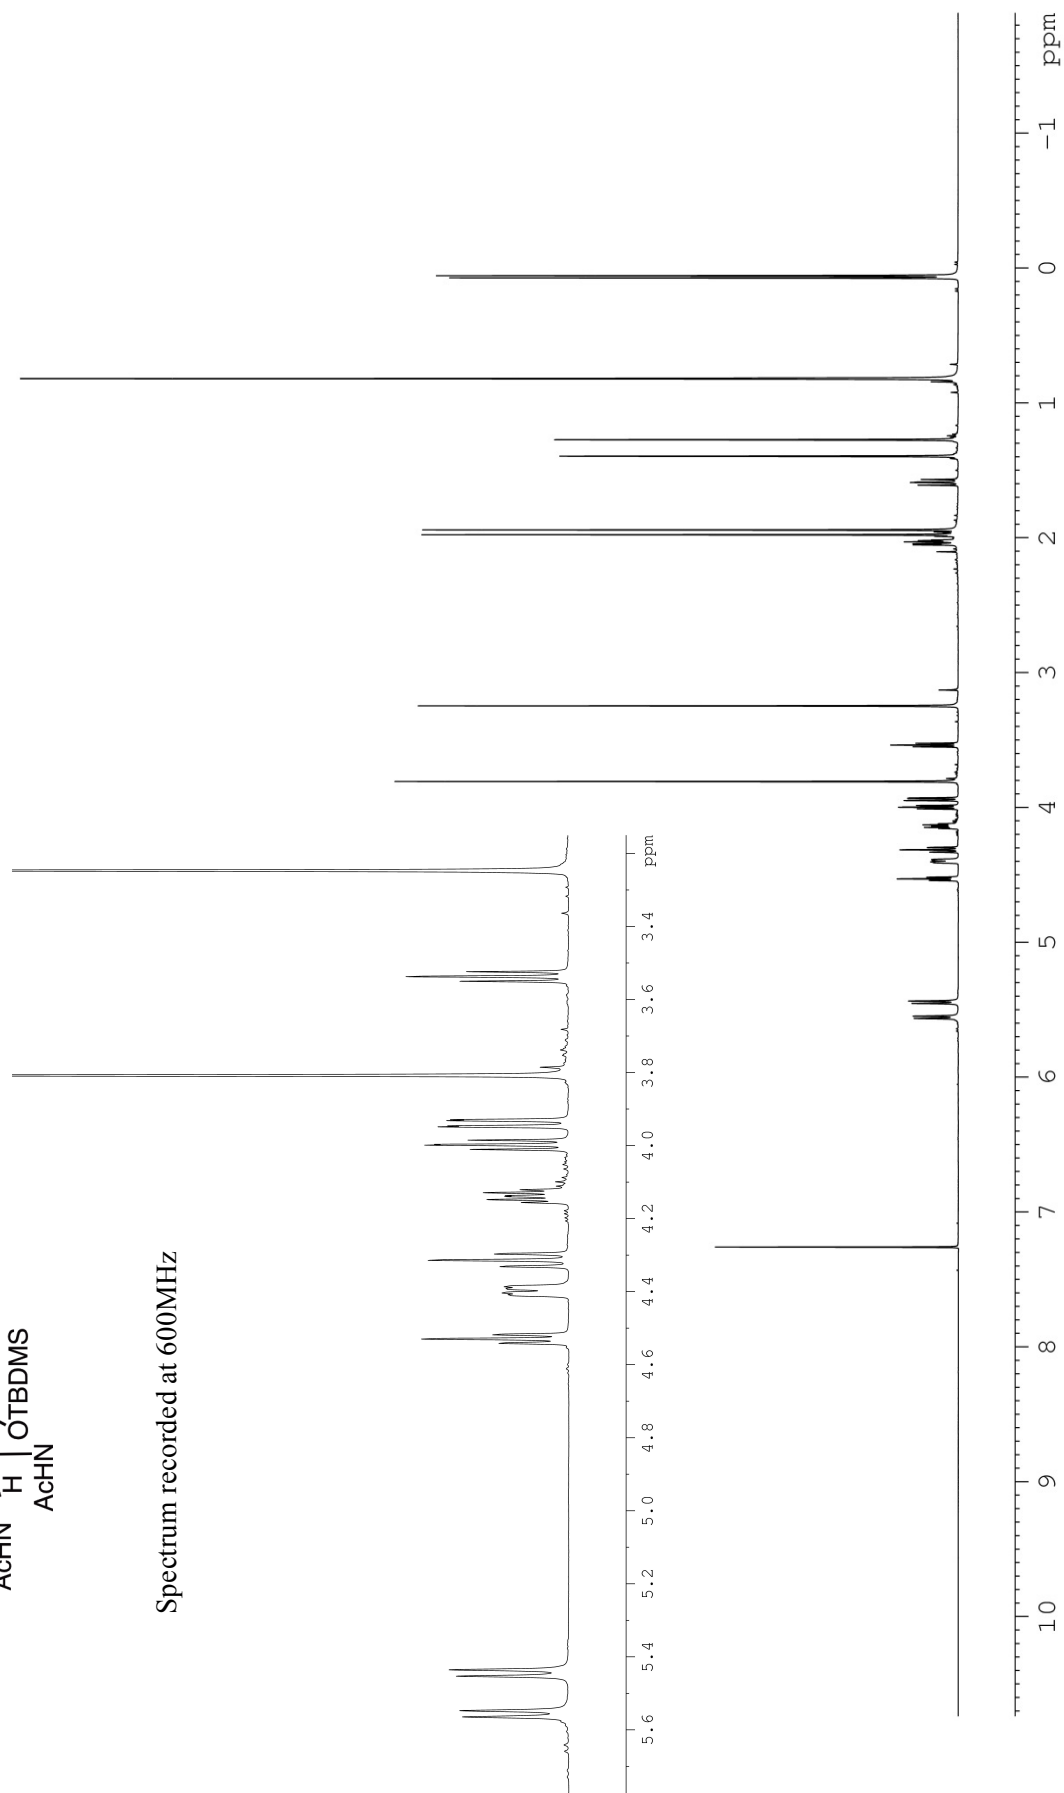

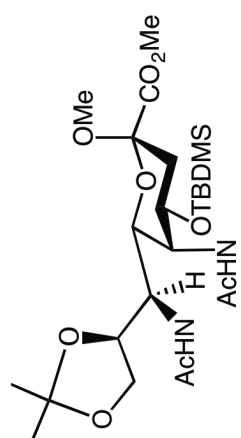

S10

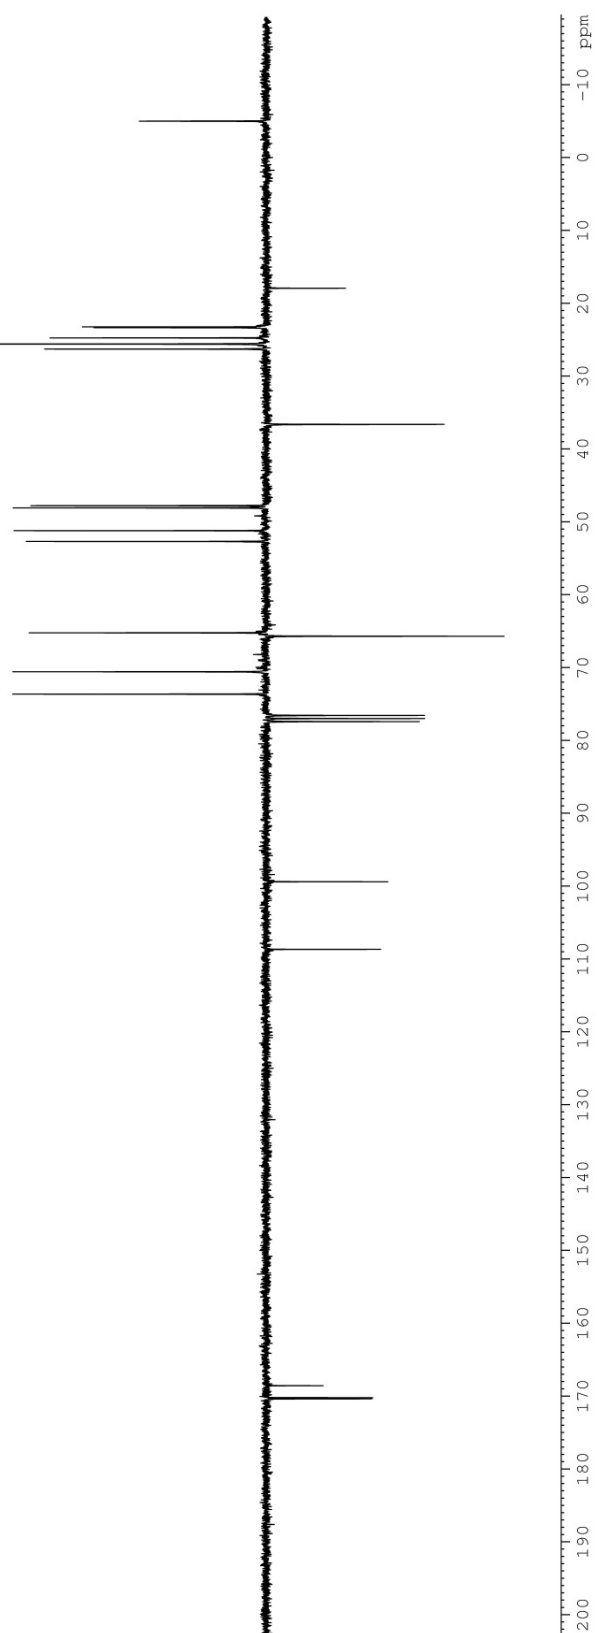

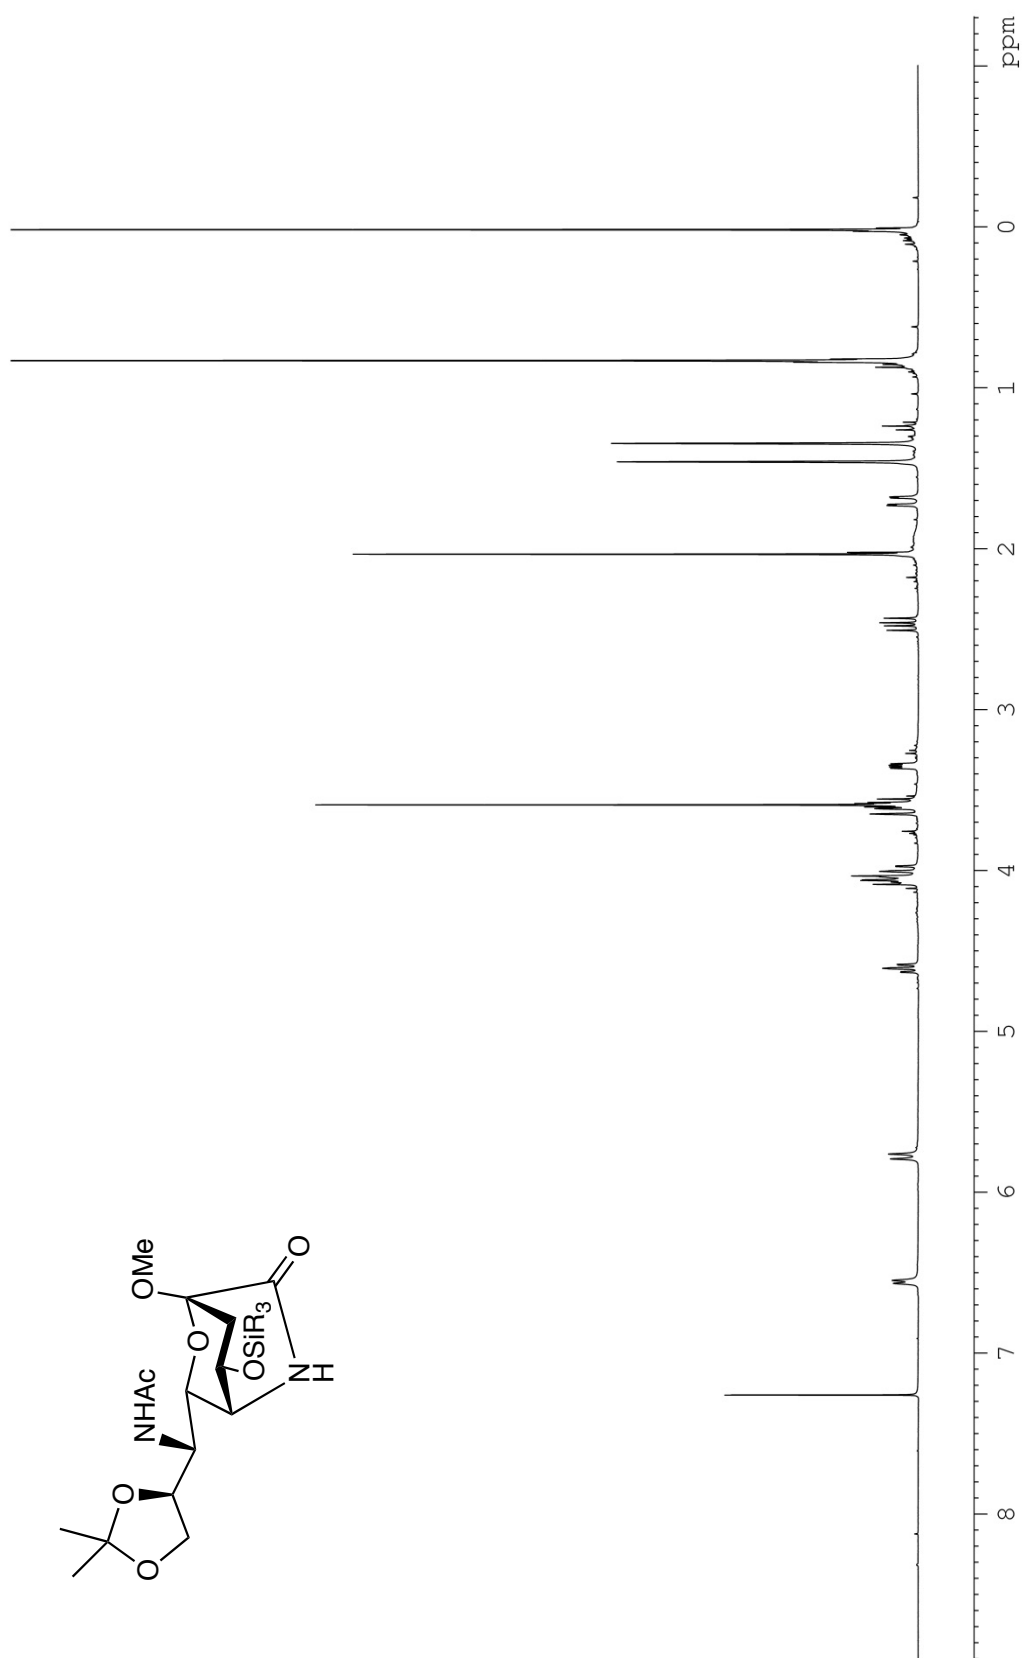

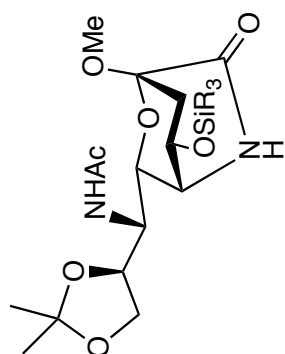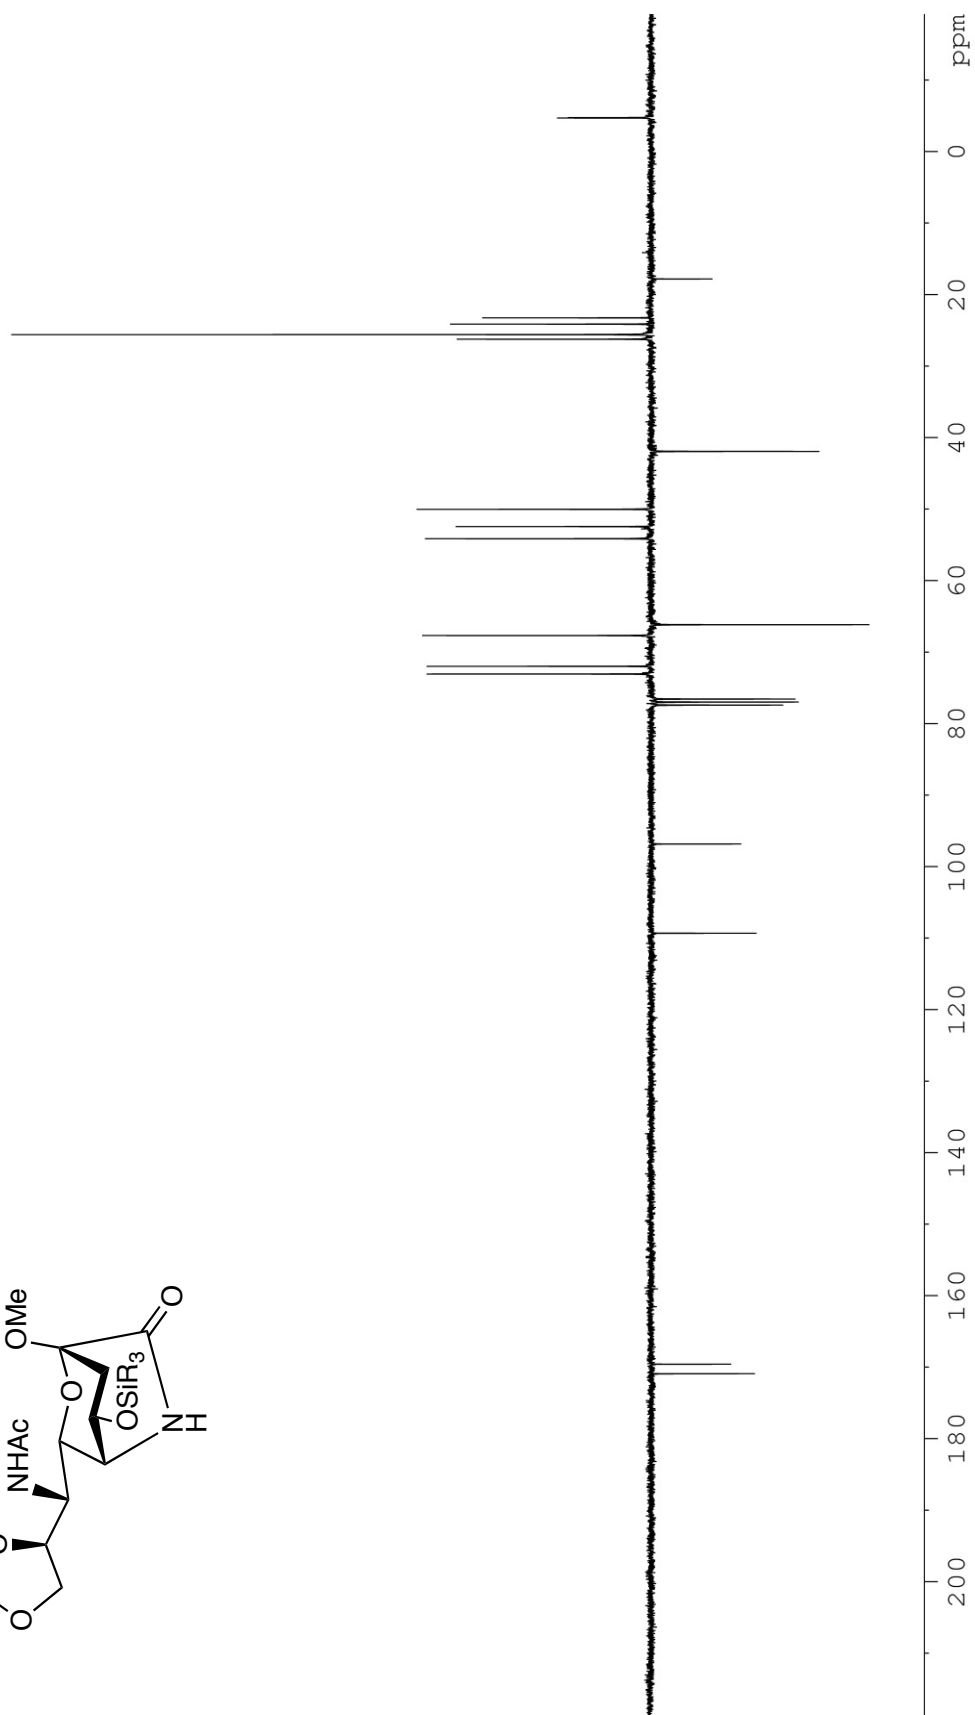

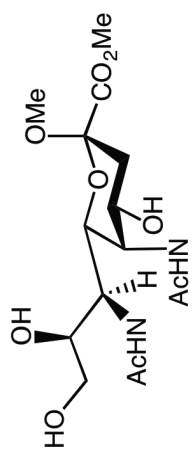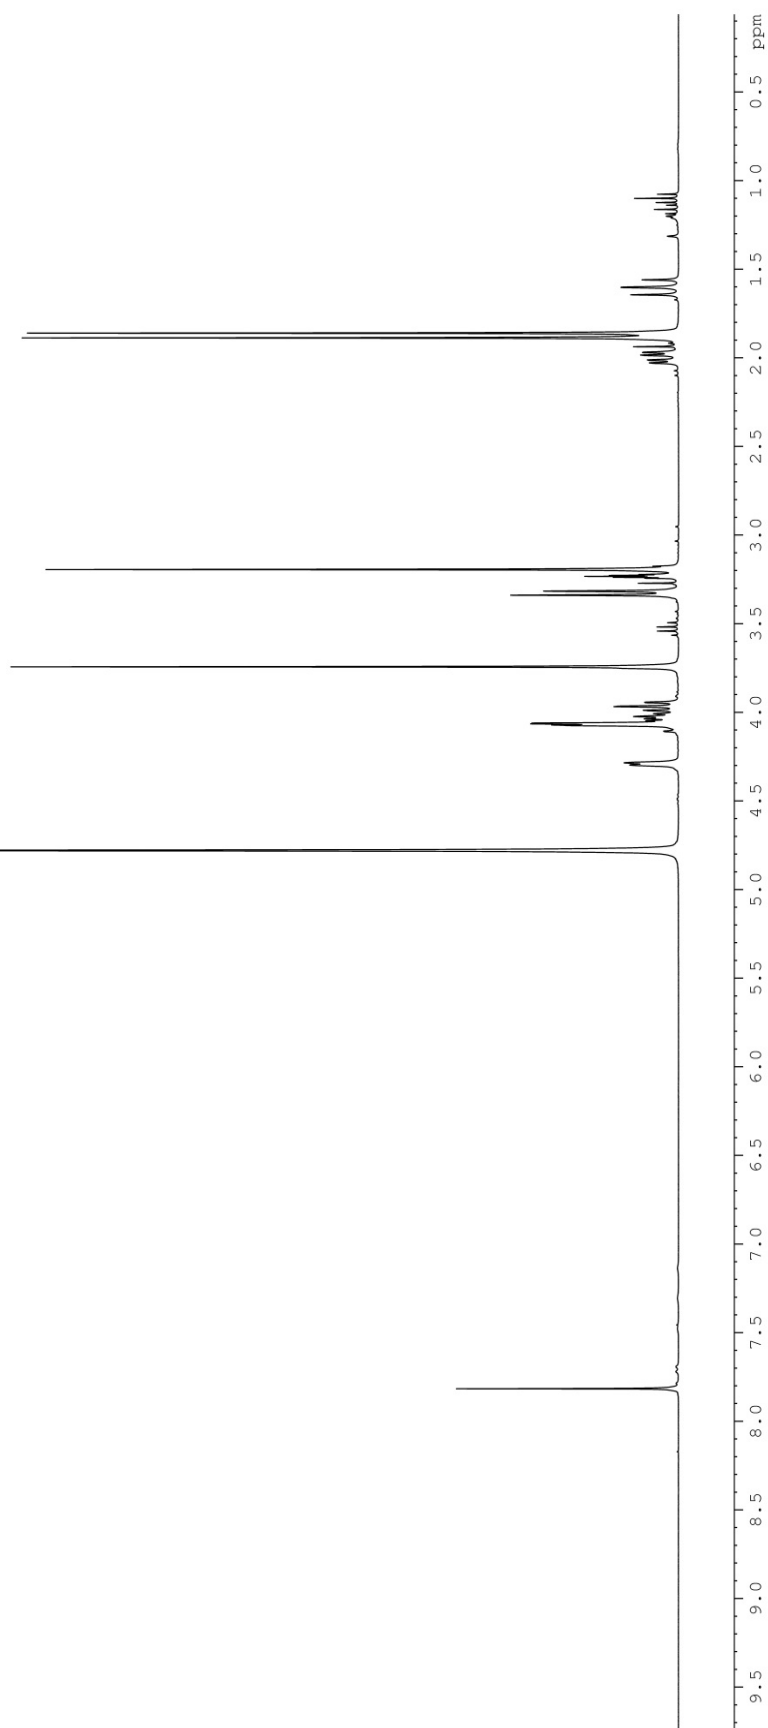

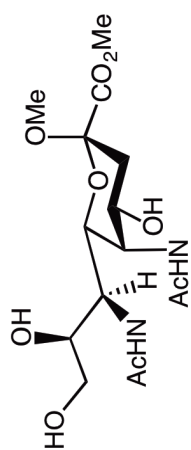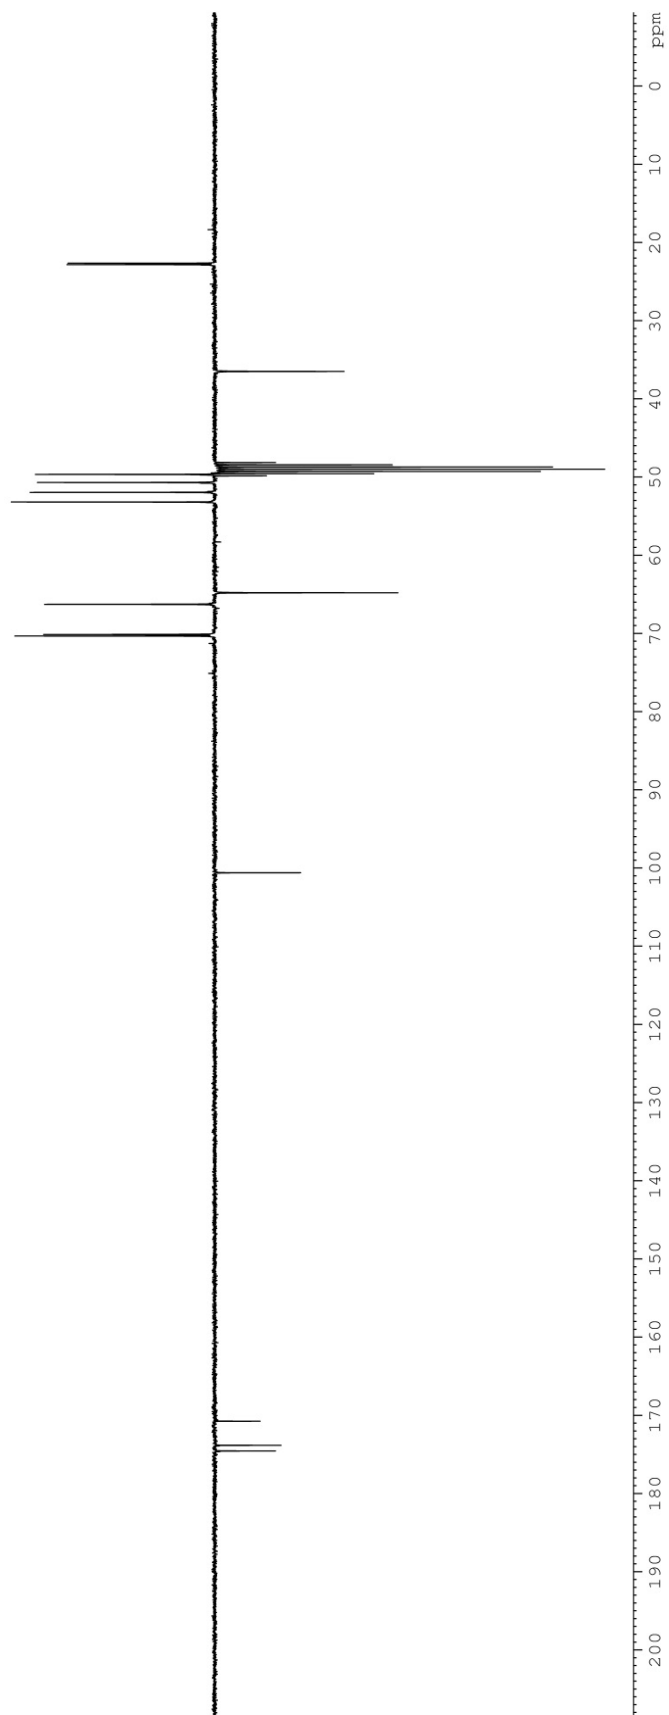

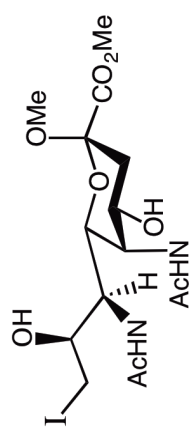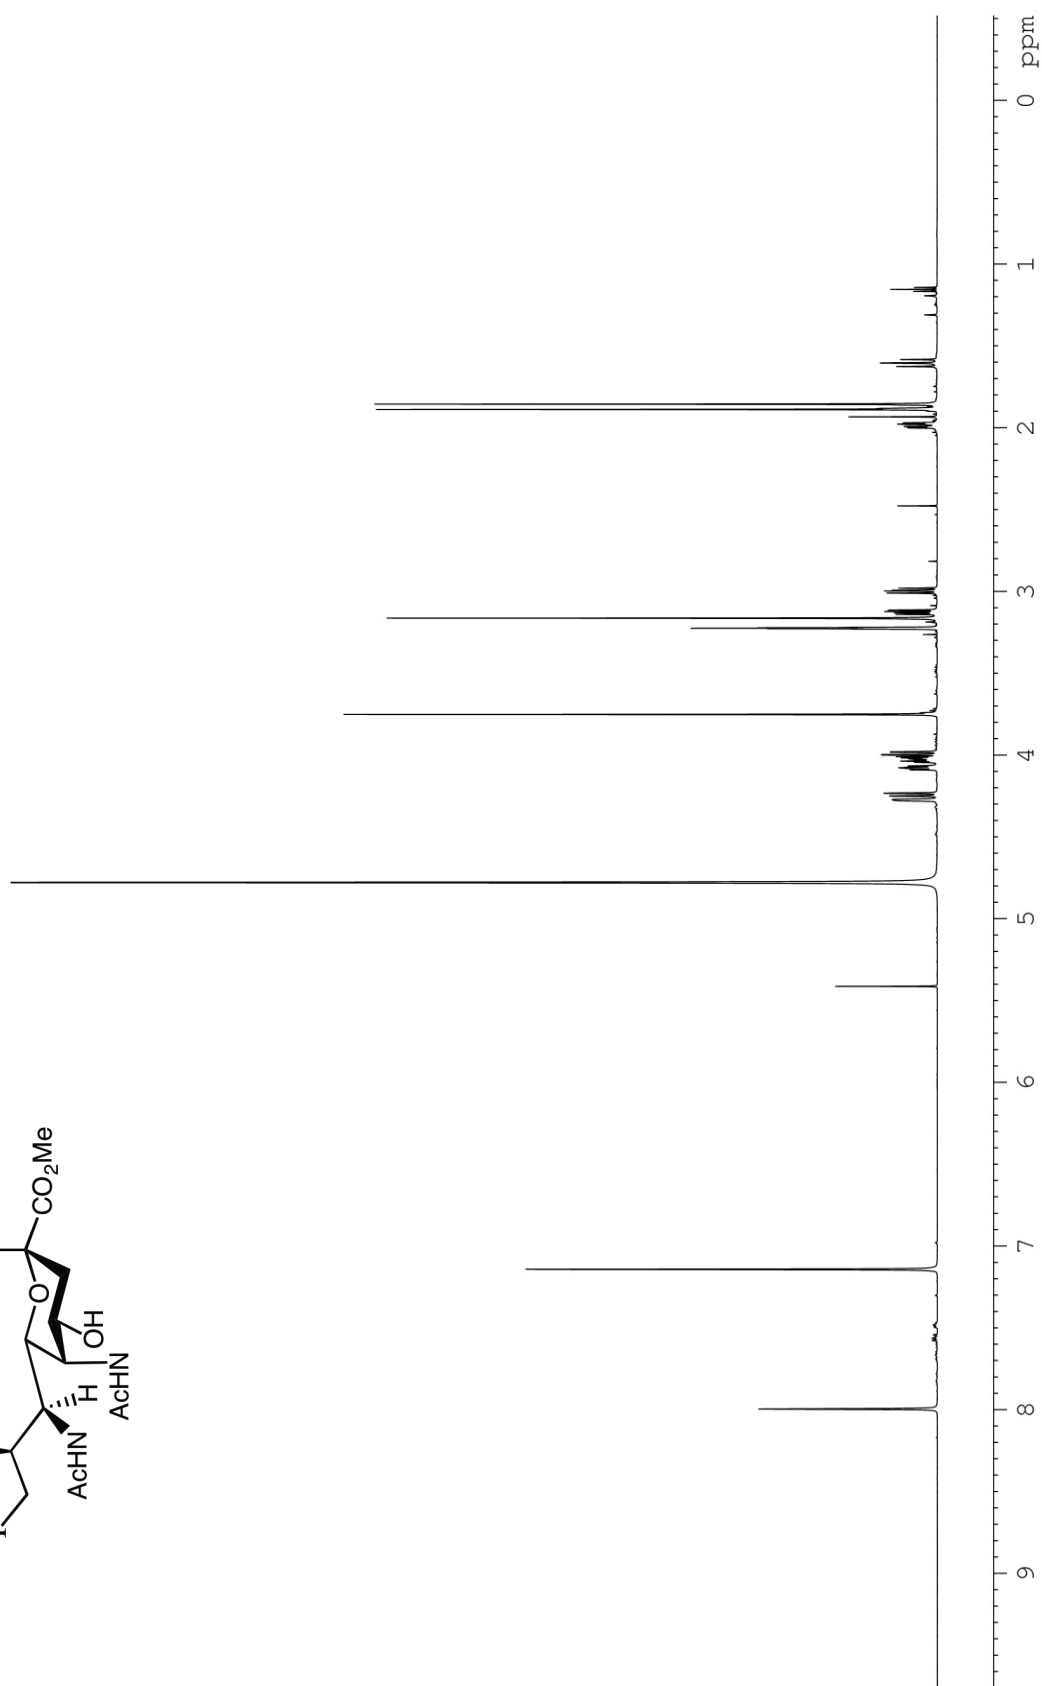

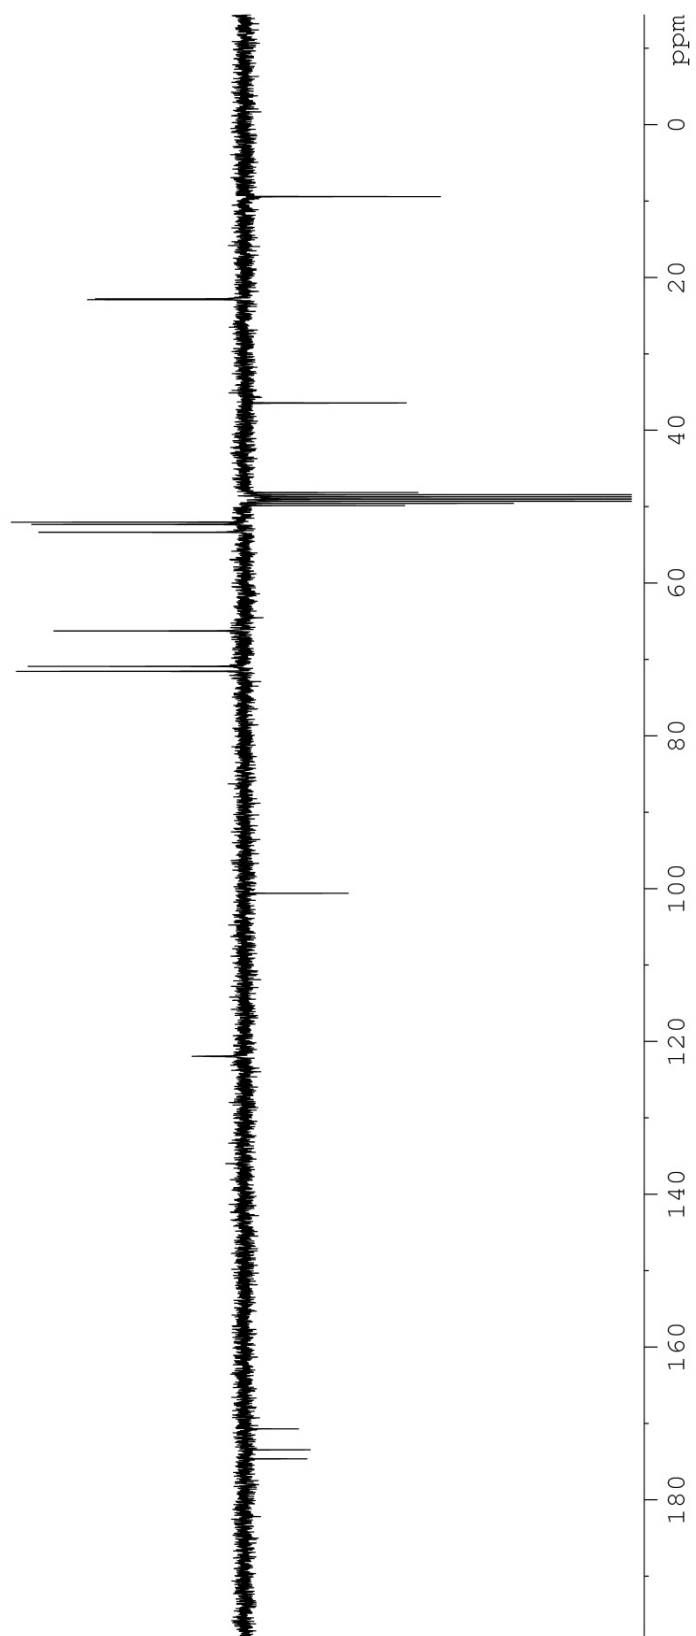



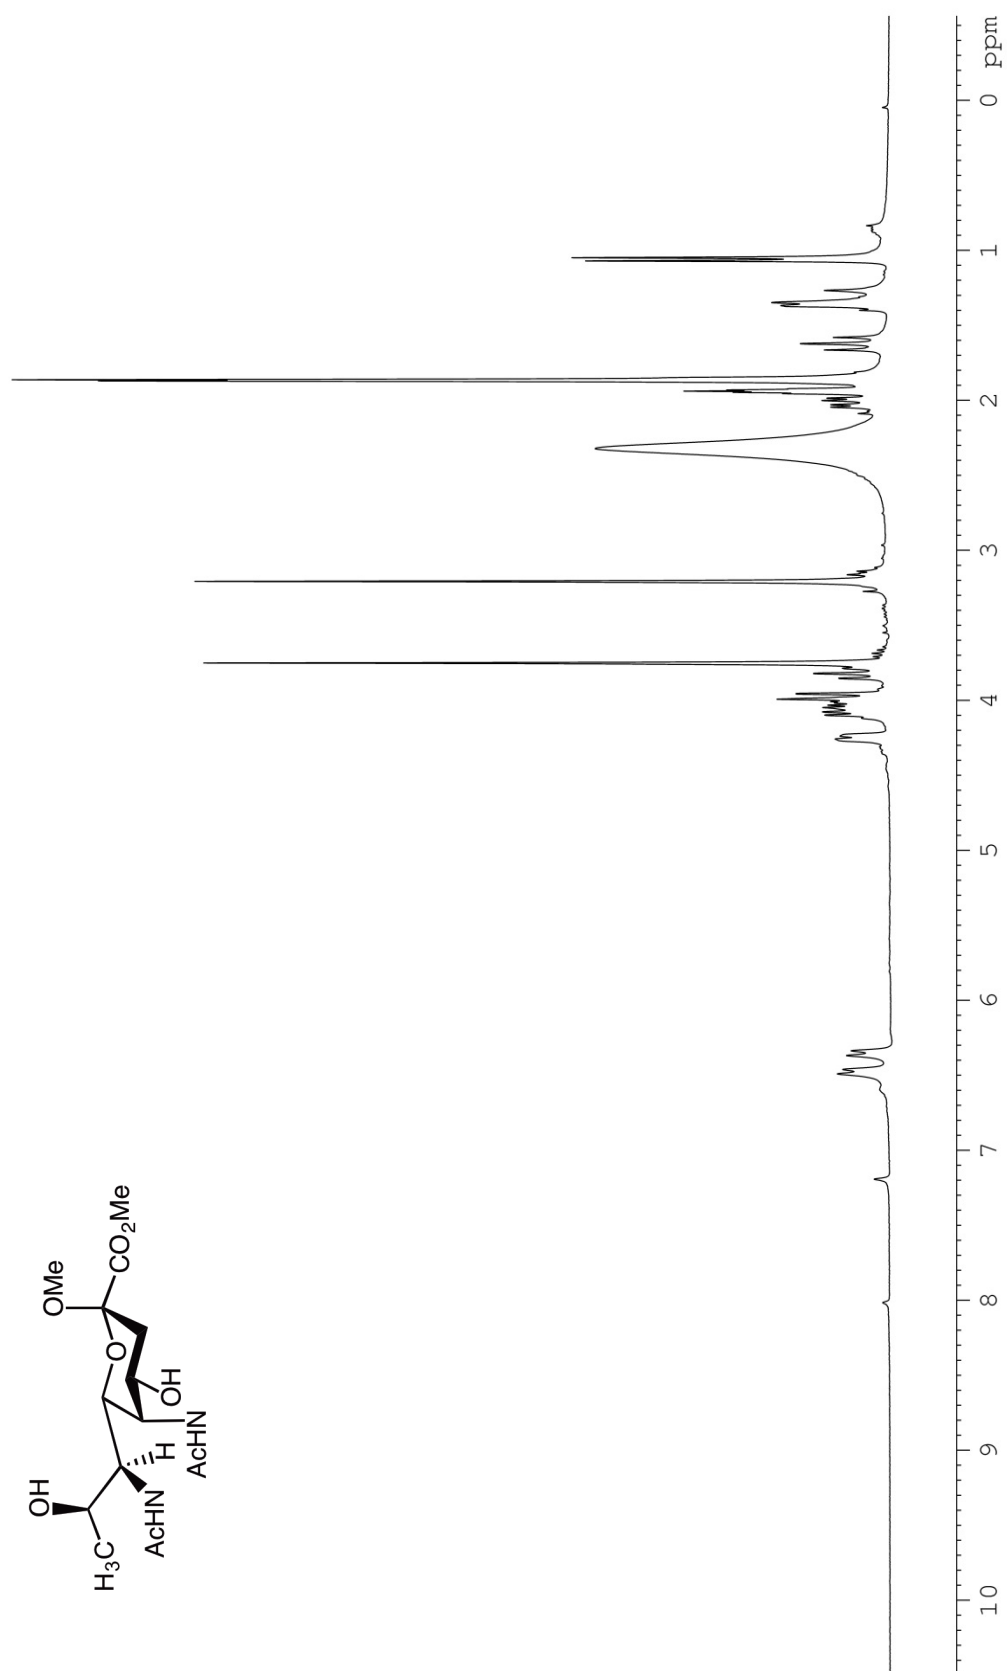

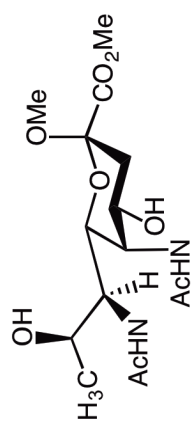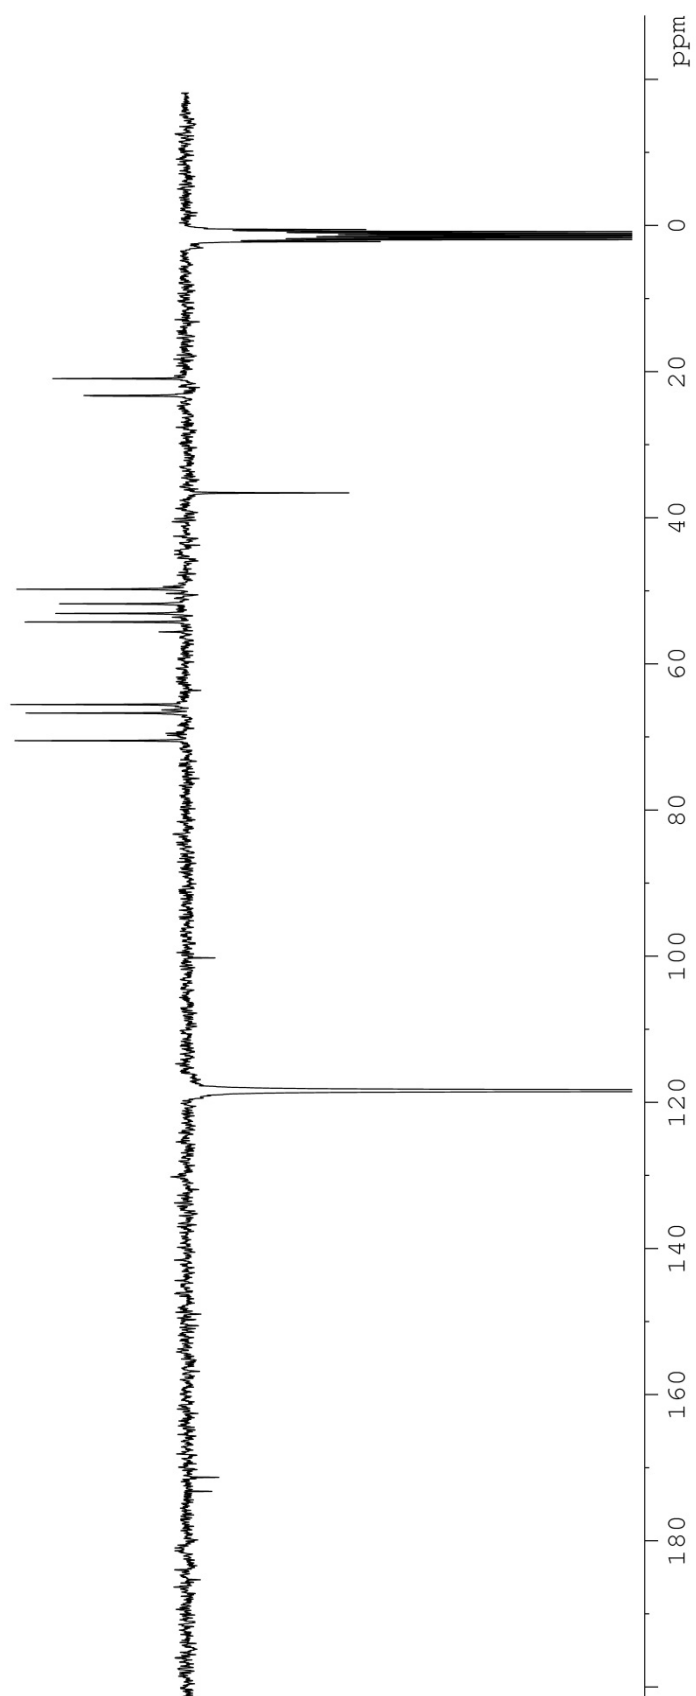

Supplement: c3ob42491j1.pdf [file c3ob42491j1.pdf]
